# Supplementary material for: Risk Factors of Venous Thromboembolism in Noncritically Ill Patients Hospitalized for Acute COVID-19 Pneumonia Receiving Prophylactic-Dose Anticoagulation
Source: MDPI journal article supplement (doi:10.3390/v14040737), 2022-03-31
Supplement: s1 [file s1]

Supplementary Table S1. Whole blood thromboelastometry and aggregometry parameters on admission.

|                                      | <b>VTE<br/>(n = 37)</b> | <b>Non-VTE<br/>(n = 171)</b> | <b>p value</b> |
|--------------------------------------|-------------------------|------------------------------|----------------|
| <b>Thromboelastometry parameters</b> |                         |                              |                |
| Intrinsic coagulation pathway,       |                         |                              |                |
| Clotting time, s                     | 187 (171-193)           | 187 (176-207)                | 0.11           |
| Clot formation time, s               | 53 (47-62)              | 52 (47-64)                   | 0.81           |
| Maximum clot firmness, mm            | 68 (64-73)              | 69 (63-72)                   | 0.65           |
| Maximum Lysis, %                     | 2 (1-6)                 | 4 (1-6)                      | 0.68           |
| Extrinsic coagulation pathway,       |                         |                              |                |
| Clotting time, s                     | 68 (64-76)              | 72 (64-80)                   | 0.24           |
| Clot formation time, s               | 48 (46-61)              | 55 (45-66)                   | 0.07           |
| Maximum clot firmness, mm            | 70 (66-74)              | 70 (65-75)                   | 0.85           |
| Maximum Lysis, %                     | 2 (1-5)                 | 3 (1-6)                      | 0.73           |
| Fibrin polymerization,               |                         |                              |                |
| Maximum clot firmness, mm            | 33 (30-41)              | 34 (27-40)                   | 0.67           |
| <b>Aggregometry parameters</b>       |                         |                              |                |
| Arachidonic acid activation          | 55 (37-67)              | 47 (27-71)                   | 0.20           |
| ADP activation                       | 52 (35-74)              | 61 (39-80)                   | 0.46           |
| Thrombin activation                  | 92 (65-107)             | 96 (73-115)                  | 0.21           |

Data are median (IQR); p values were calculated by  $\chi^2$  test or Mann-Whitney U test, as appropriate. ADP=adenosine diphosphate.
